# Supplementary material for: Role of structures with penta- and hexacoordinate silicon in the nucleophile-catalyzed hydrolysis of tetramethoxysilane
Source: Royal Society of Chemistry journal article supplement (doi:10.1039/b812192c), 2008-12-03
Supplement: b812192c.pdf [file b812192c.pdf]

## SUPPLEMENTARY MATERIAL

**Table 1.** Imaginary frequencies ( $\text{cm}^{-1}$ ) calculated for the unbound normal mode in the so-called TS1, TS5 and TS6.

|              |                | <i>Imaginary frequencies (in <math>\text{cm}^{-1}</math>)</i> |            |            |
|--------------|----------------|---------------------------------------------------------------|------------|------------|
|              |                | <b>TS1</b>                                                    | <b>TS5</b> | <b>TS6</b> |
| <b>b3lyp</b> | <b>6-31G*</b>  | -811                                                          | -912       | -705       |
|              | <b>cc-pVDZ</b> | -788                                                          | -886       | -725       |
| <b>mp2</b>   | <b>6-31G*</b>  | -887                                                          | -974       | -794       |
|              | <b>cc-pVDZ</b> | -802                                                          | -891       | -680       |

**Table 2.** Transmission coefficients calculated using the Wigner approximation for the uncatalyzed (TS1), catalyzed with ammonia (TS5) and catalyzed with OH (TS6), hydrolysis reaction of the TMOS at 273K and 300K.

|              |                | <i>Transmission coefficient<br/>(at <math>T=273\text{K}</math>)</i> |            |            | <i>Transmission coefficient<br/>(at <math>T=300\text{K}</math>)</i> |            |            |
|--------------|----------------|---------------------------------------------------------------------|------------|------------|---------------------------------------------------------------------|------------|------------|
|              |                | <b>TS1</b>                                                          | <b>TS5</b> | <b>TS6</b> | <b>TS1</b>                                                          | <b>TS5</b> | <b>TS6</b> |
| <b>b3lyp</b> | <b>6-31G*</b>  | 1,019                                                               | 1,024      | 1,015      | 1,016                                                               | 1,020      | 1,012      |
|              | <b>cc-pVDZ</b> | 1,018                                                               | 1,023      | 1,015      | 1,015                                                               | 1,019      | 1,013      |
| <b>mp2</b>   | <b>6-31G*</b>  | 1,023                                                               | 1,028      | 1,018      | 1,019                                                               | 1,023      | 1,015      |
|              | <b>cc-pVDZ</b> | 1,019                                                               | 1,023      | 1,014      | 1,016                                                               | 1,019      | 1,011      |
